# Supplementary material
Source: MDPI journal article supplement (https://www.mdpi.com/2304-6740/11/10/385)
Supplement: s1 [file s1]

# **Benzimidazol-2-ylidene Silver Complexes: Synthesis, Characterization, Antimicrobial and Antibiofilm Activities, Molecular Docking and Theoretical Investigations**

Uğur Tutar, Cem Çelik, Elvan Üstün, Namık Özdemir, Neslihan Şahin, David Sémeril,

Nevin Gürbüz and İsmail Özdemir

## **Contents**

|                                                                                                                                      |      |
|--------------------------------------------------------------------------------------------------------------------------------------|------|
| Characterizing data of chloro[1-methallyl-3-benzyl)benzimidazol-2-ylidene]silver(I) (6)                                              | p 2  |
| Characterizing data of chloro[1-methallyl-3-(2,3,5,6-tetramethylbenzyl)benzimidazol-2-ylidene]silver(I) (7)                          | p 4  |
| Characterizing data of chloro[1-methallyl-3-(3,4,5-trimethoxylbenzyl)benzimidazol-2-ylidene]silver(I) (8)                            | p 6  |
| Characterizing data of chloro[1-methallyl-3-(naphthylmethyl)benzimidazol-2-ylidene]silver(I) (9)                                     | p 8  |
| Characterizing data of chloro[1-methallyl-3-(anthracen-9-yl-methyl)benzimidazol-2-ylidene]silver(I) (10)                             | p 10 |
| Interaction details of Ciprofloxacin and Fluconazole with DNA gyrase of <i>Escherichia Coli</i> and CYP51 of <i>Candida albicans</i> | p12  |
| Interaction details of complexes 6-10 with DNA gyrase of <i>Escherichia Coli</i> and CYP51 of <i>Candida albicans</i>                | p 13 |

# Chloro[1-methallyl-3-benzyl)benzimidazol-2-ylidene]silver(I) (6)

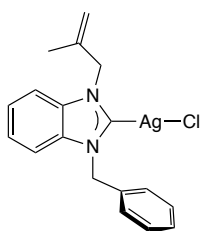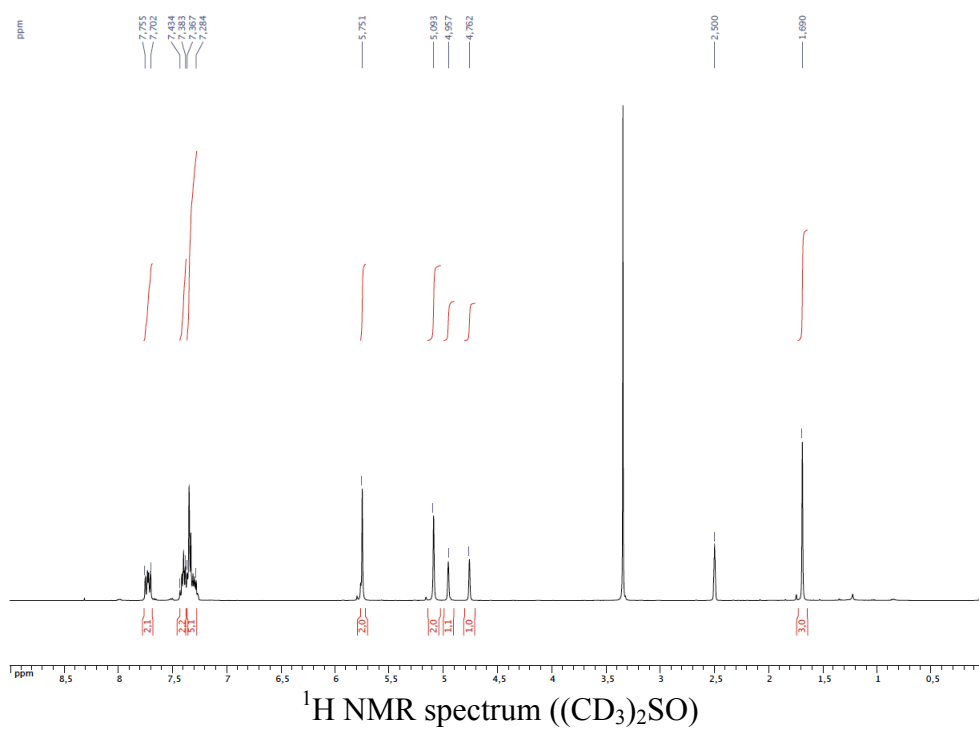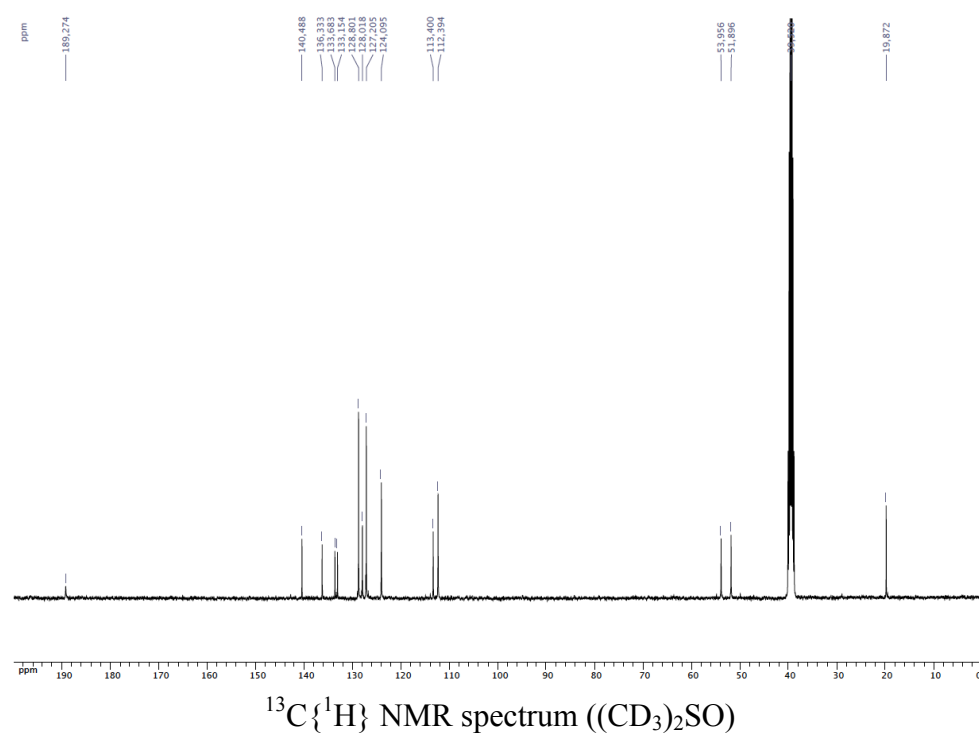



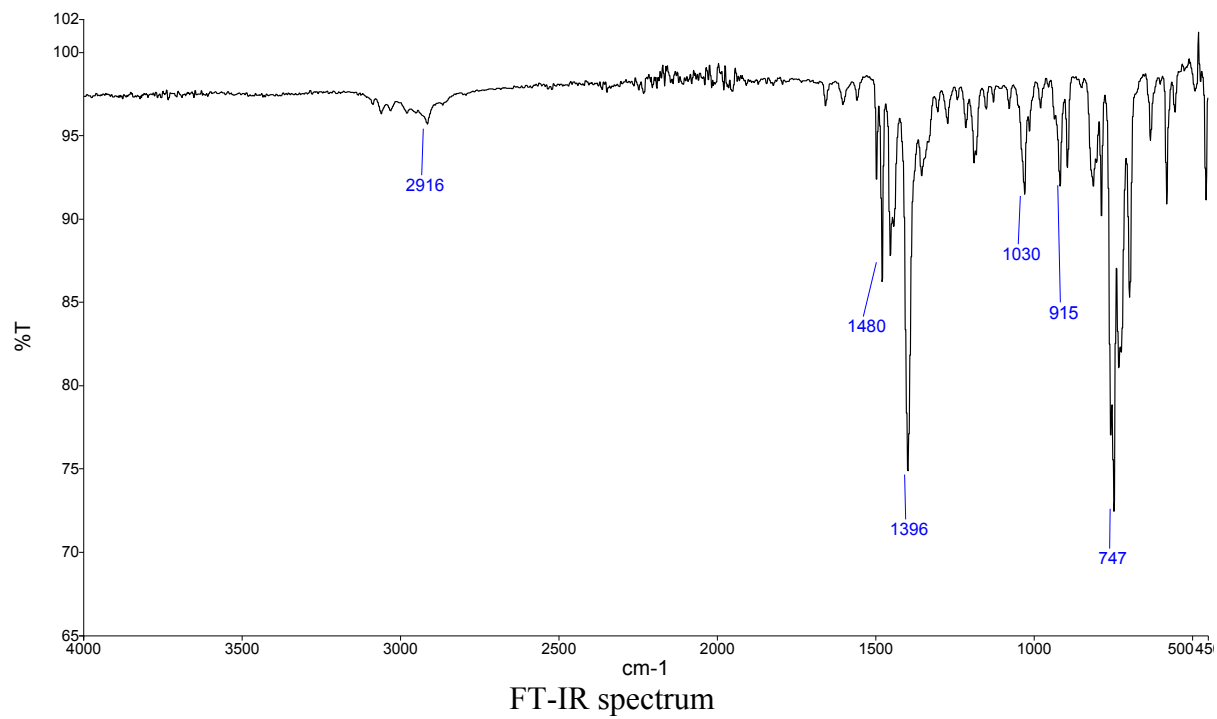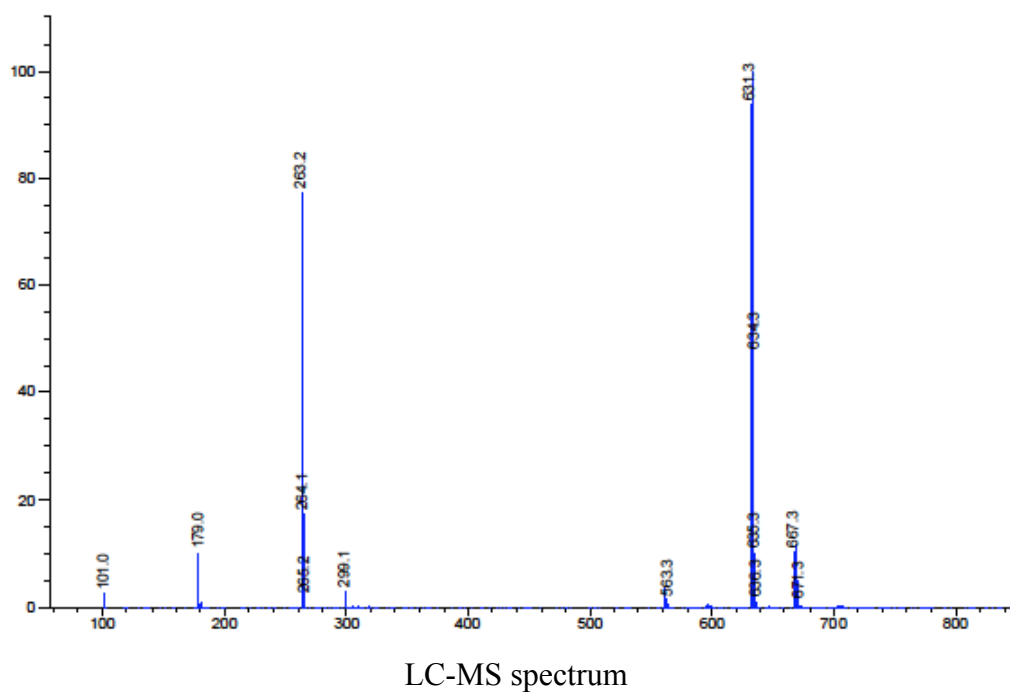

**Chloro[1-methallyl-3-(2,3,5,6-tetramethylbenzyl)benzimidazol-2-ylidene]silver(I) (7)**

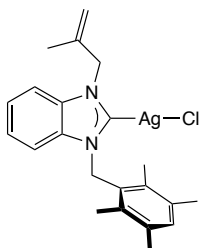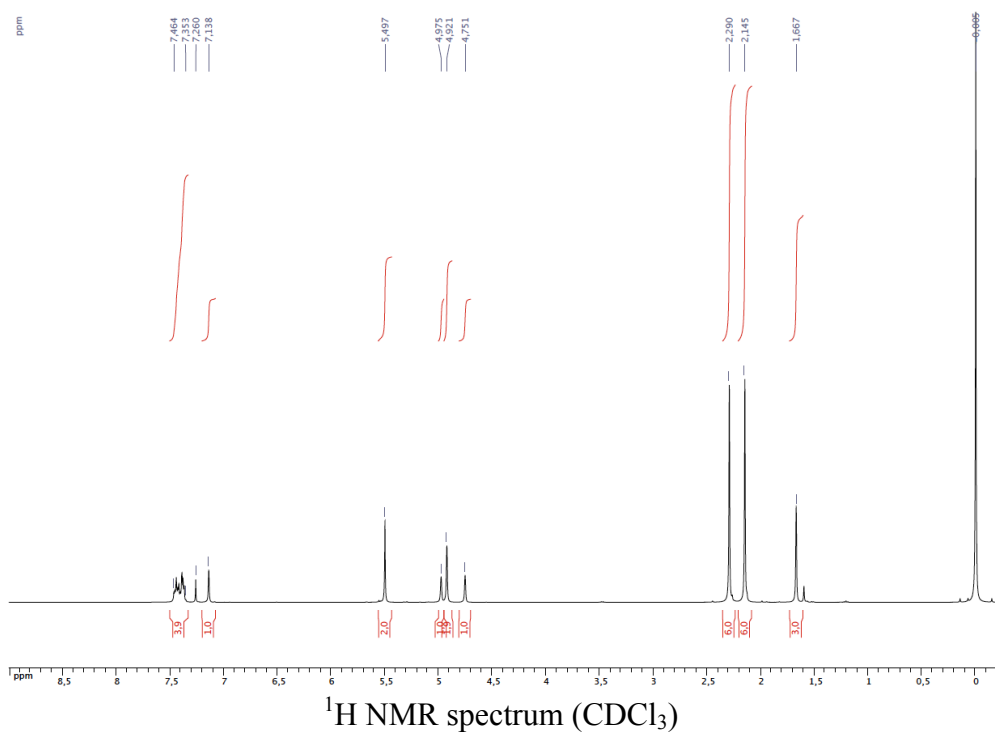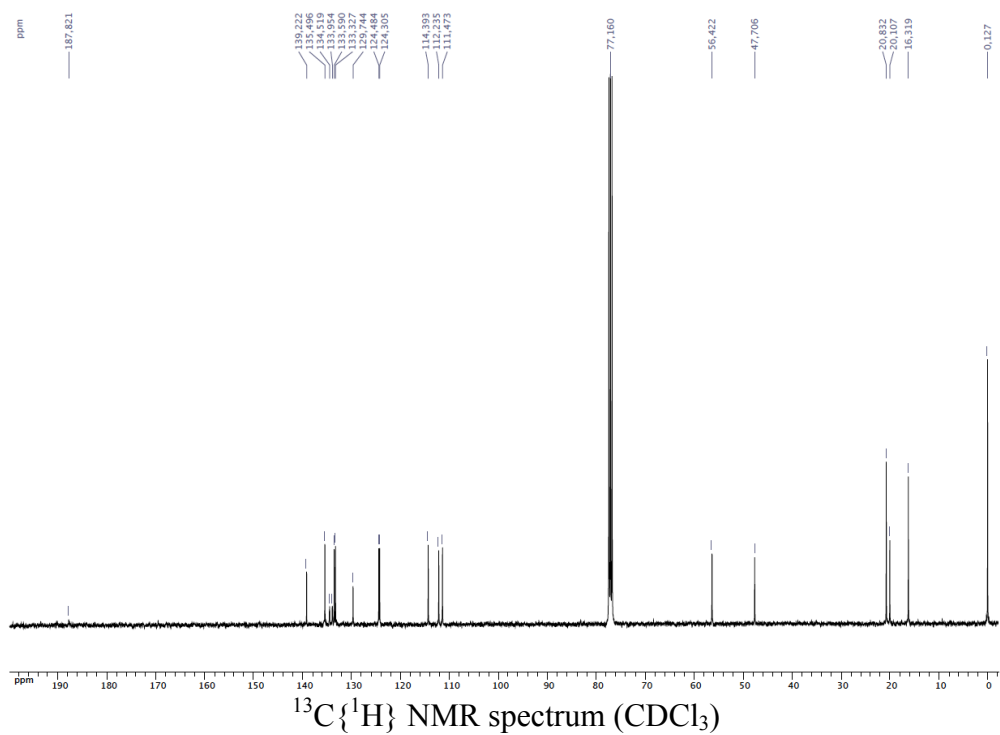

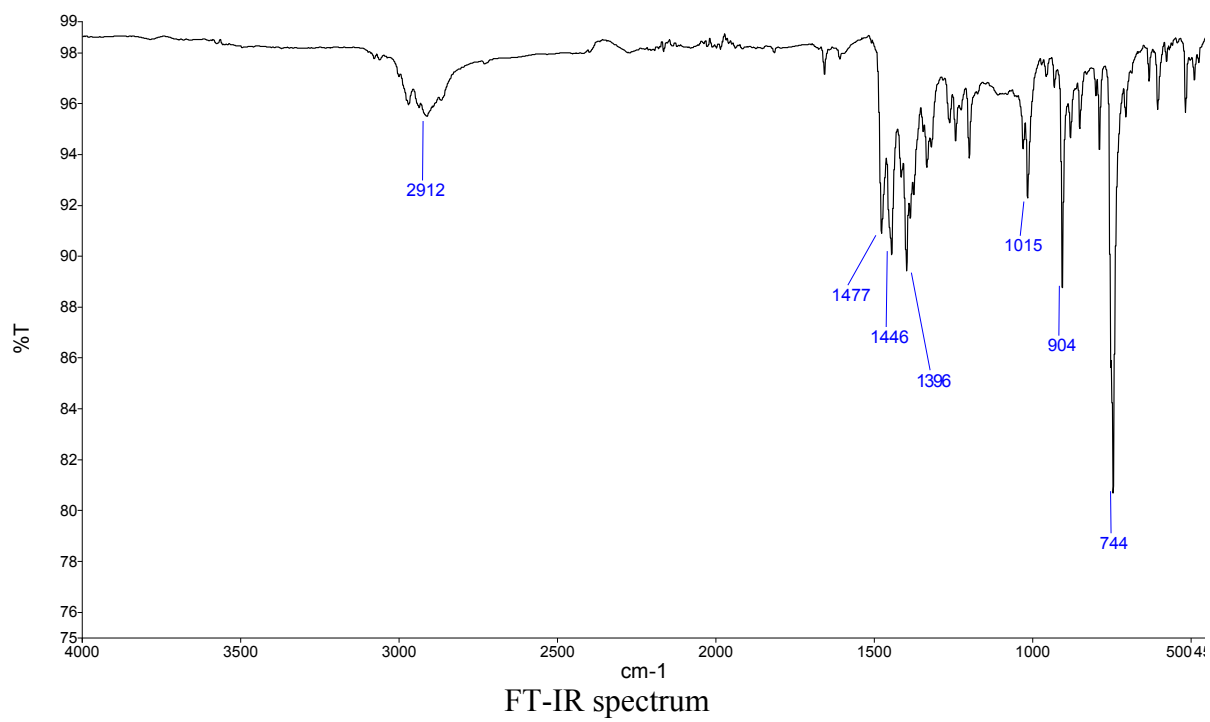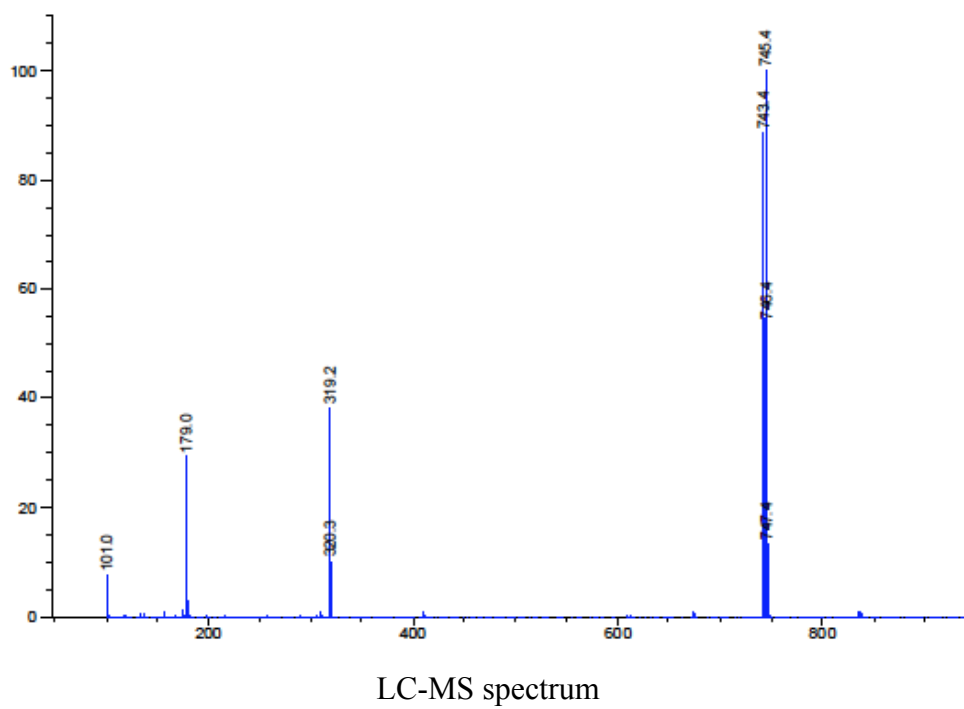

**Chloro[1-methallyl-3-(3,4,5-trimethoxybenzyl)benzimidazol-2-ylidene]silver(I) (8)**

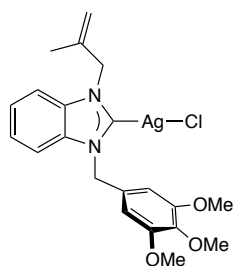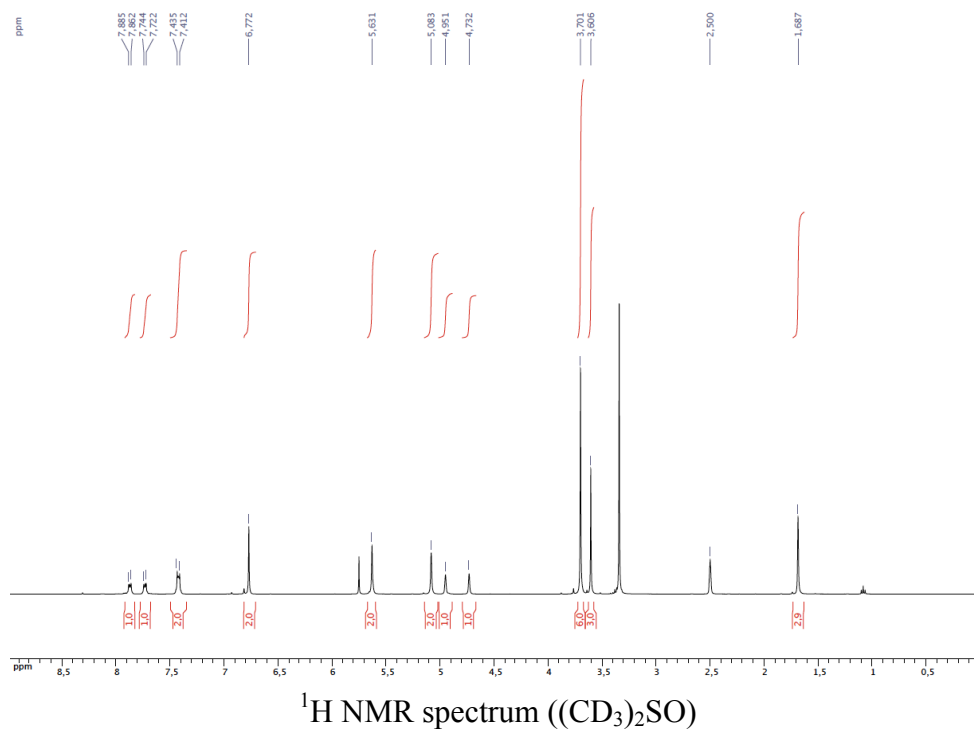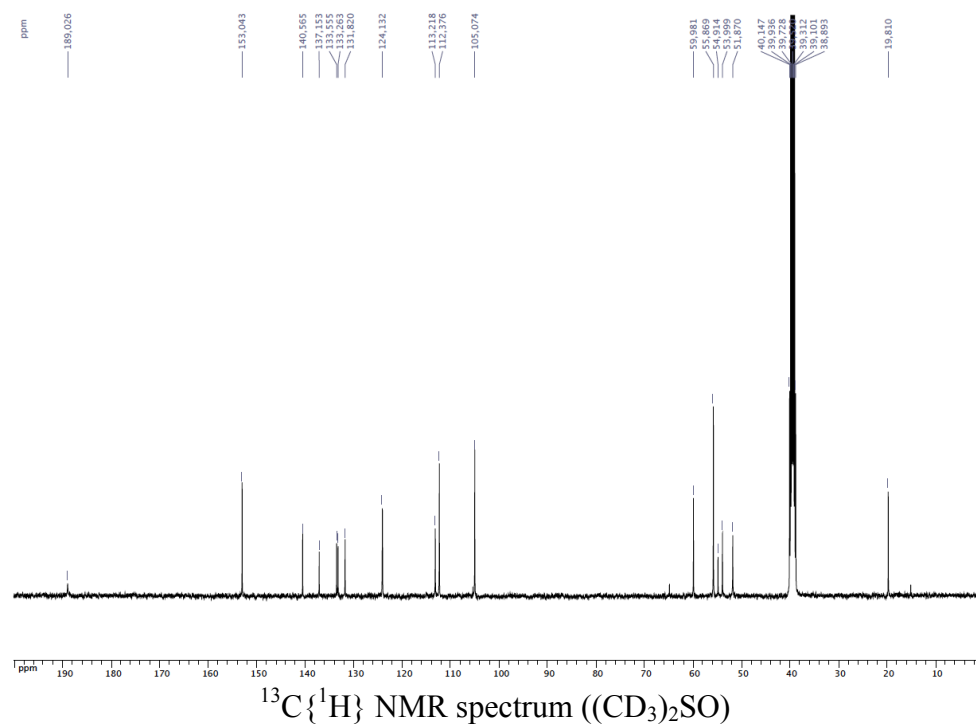

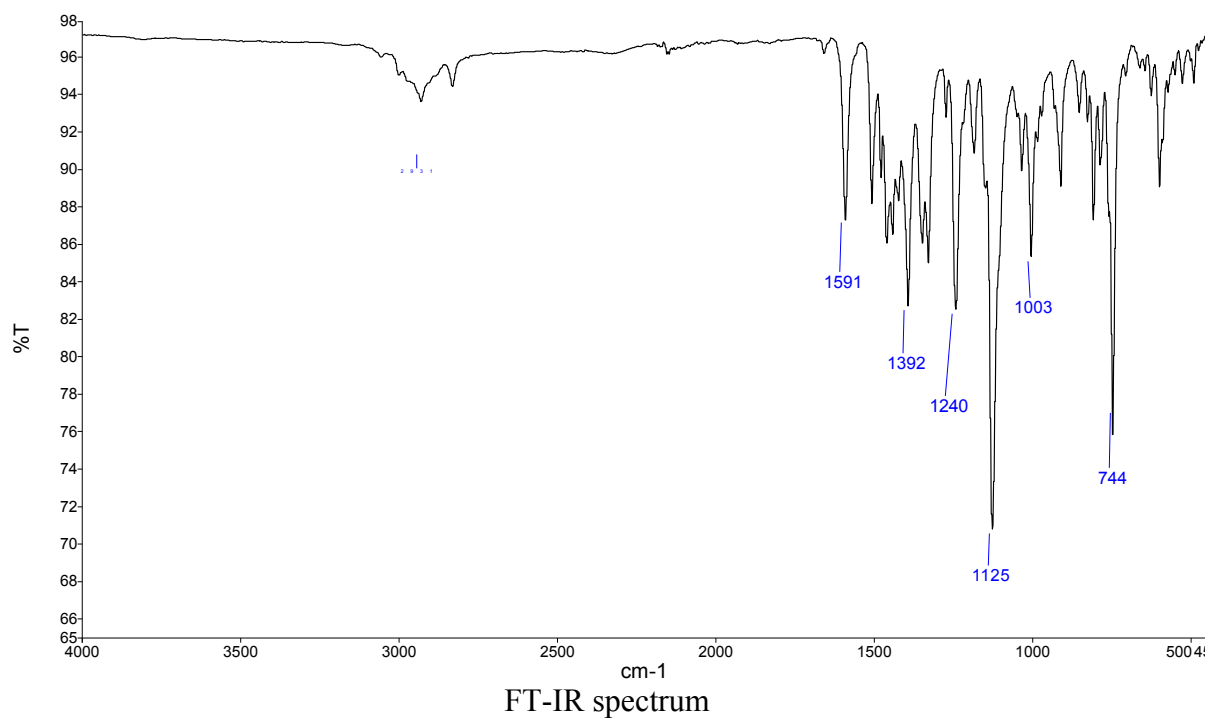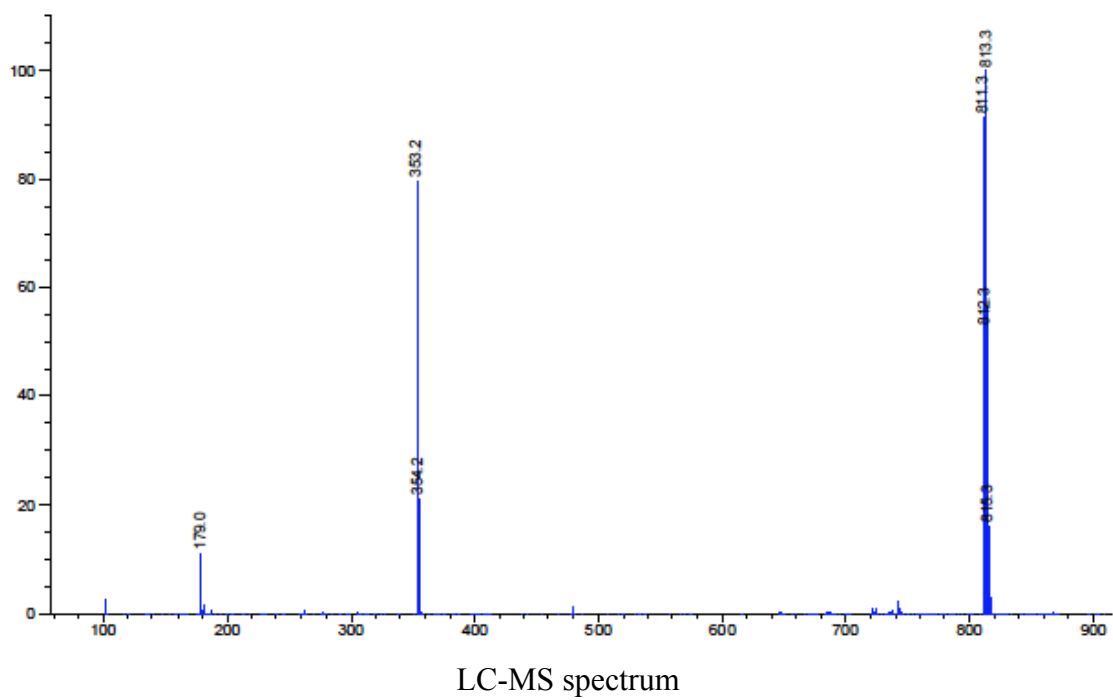

**Chloro[1-methallyl-3-(naphthylmethyl)benzimidazol-2-ylidene]silver(I) (9)**

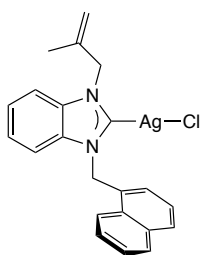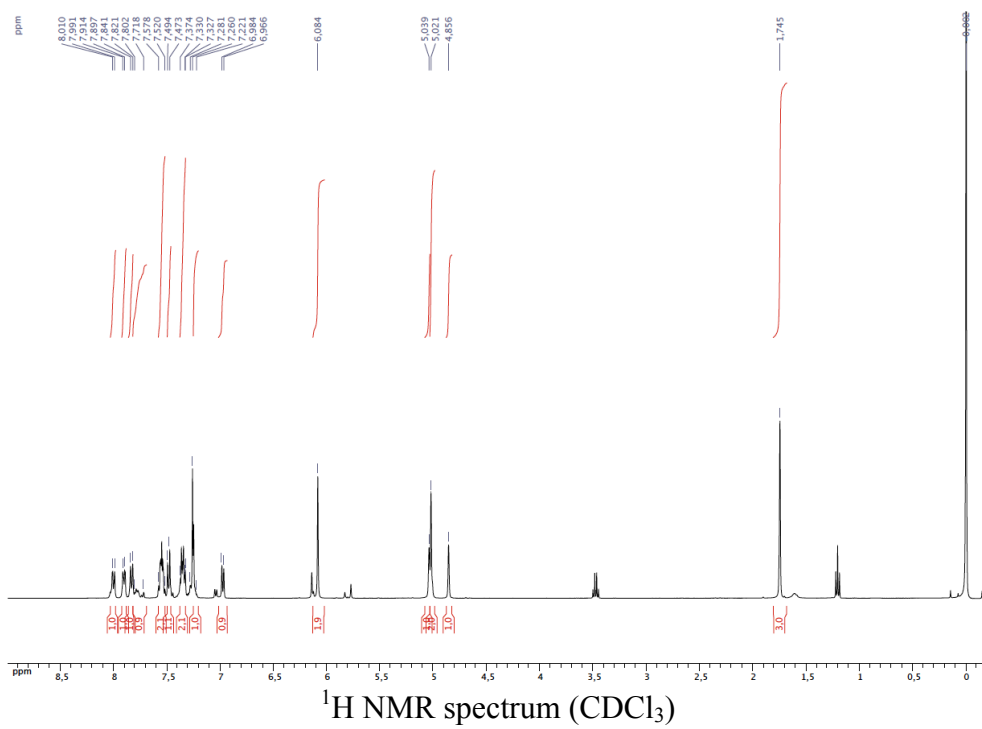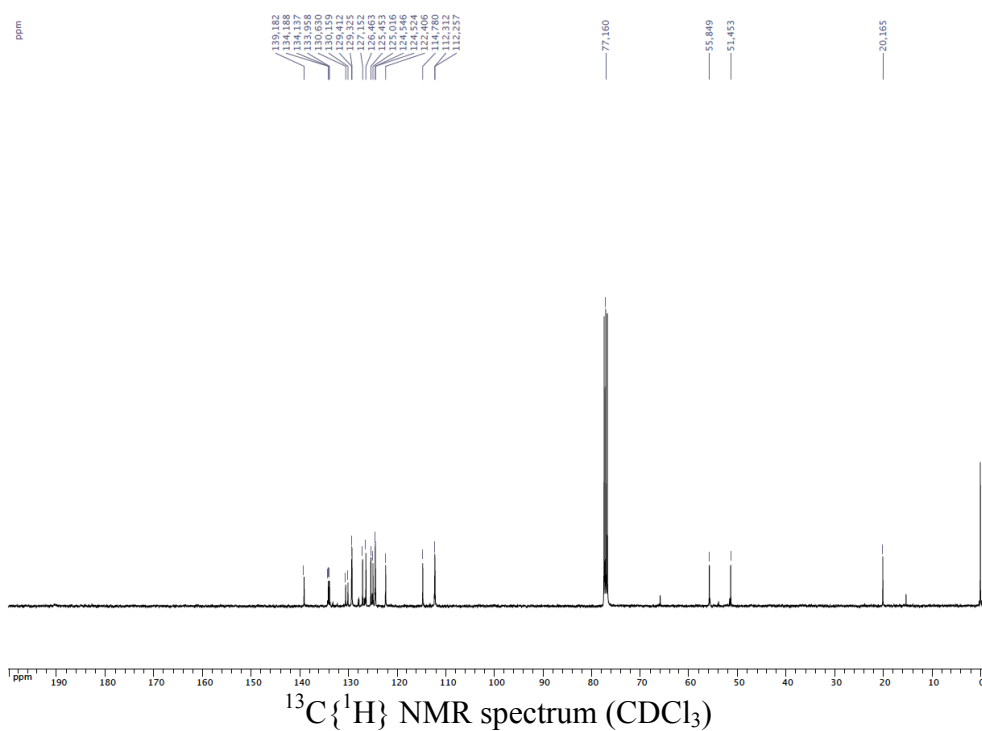

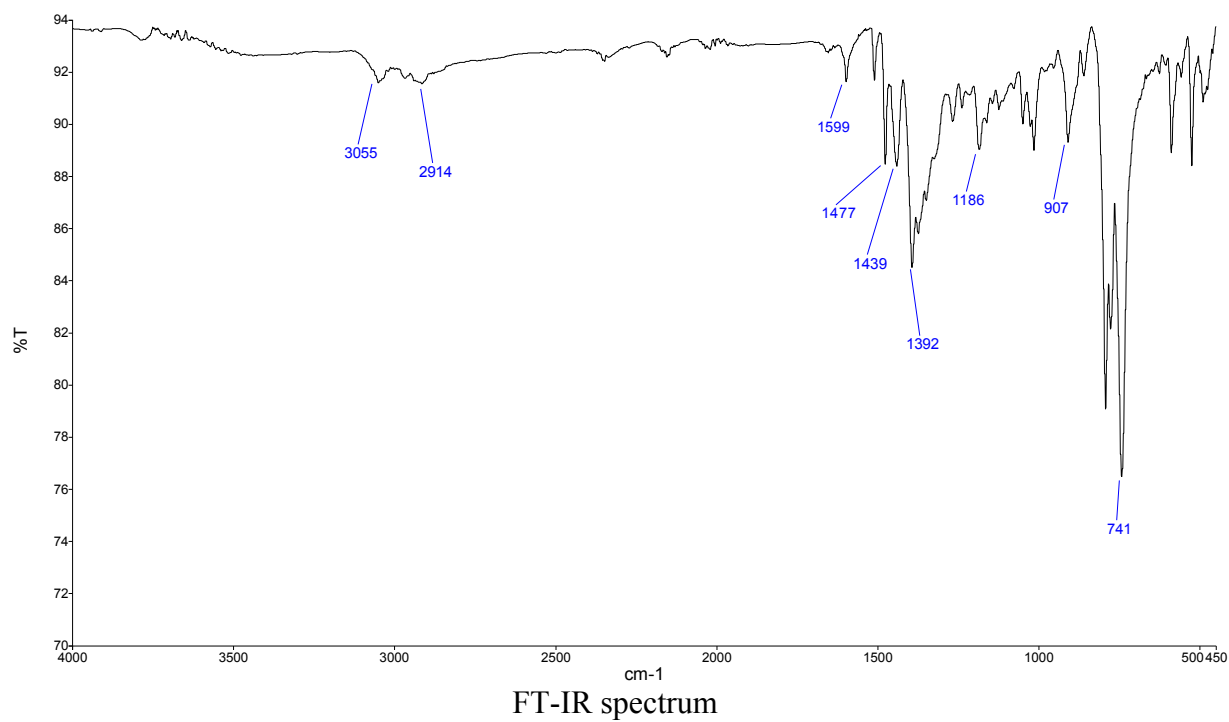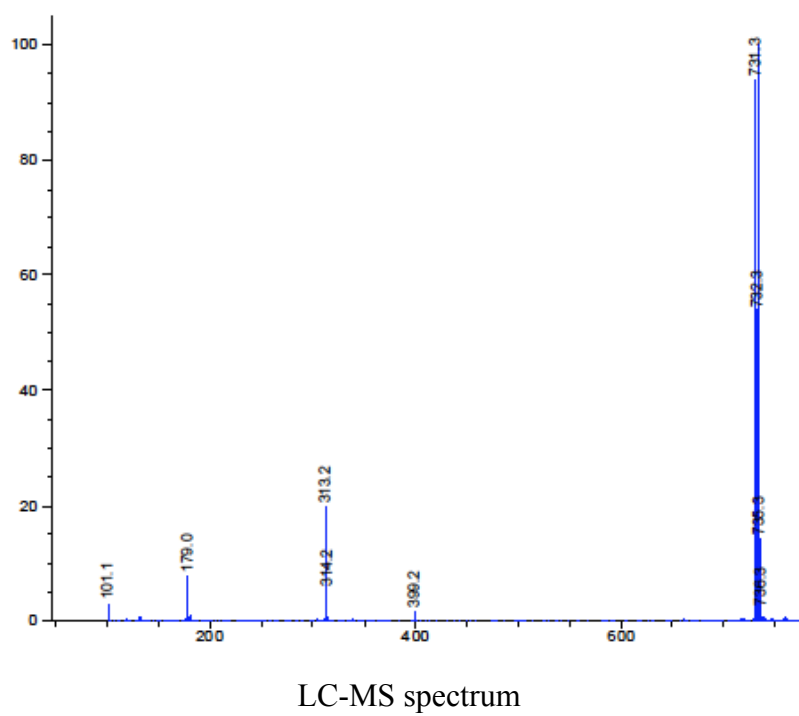

**Chloro[1-methylallyl-3-(anthracen-9-yl-methyl)benzimidazol-2-ylidene]silver(I) (10)**

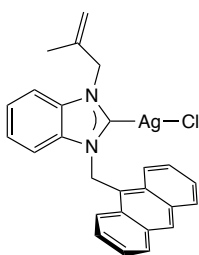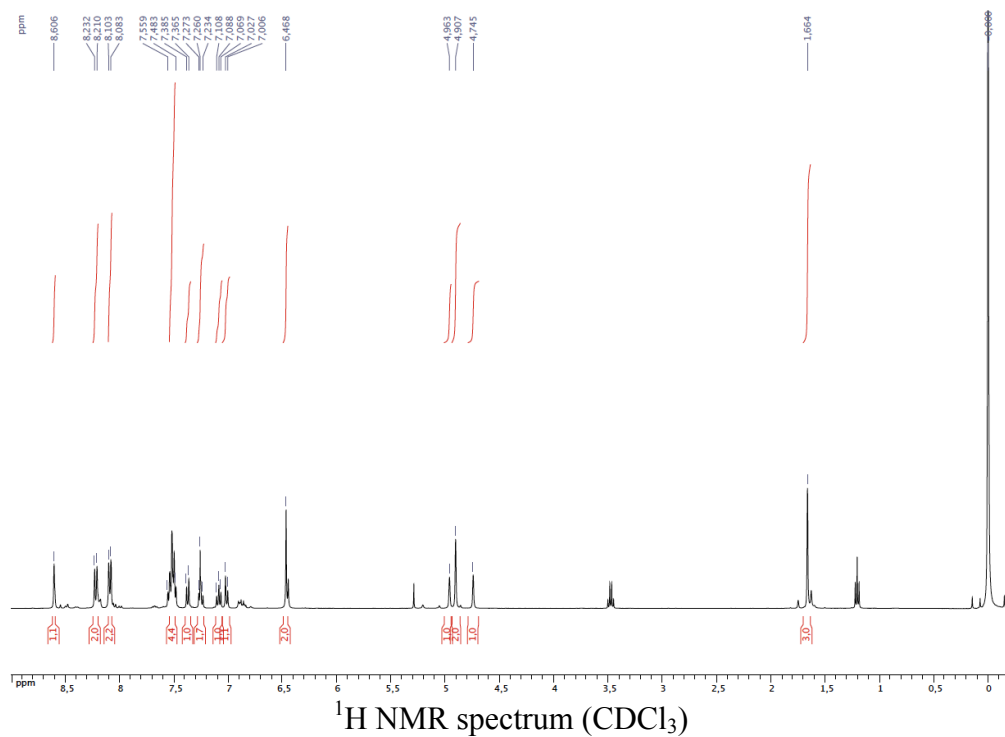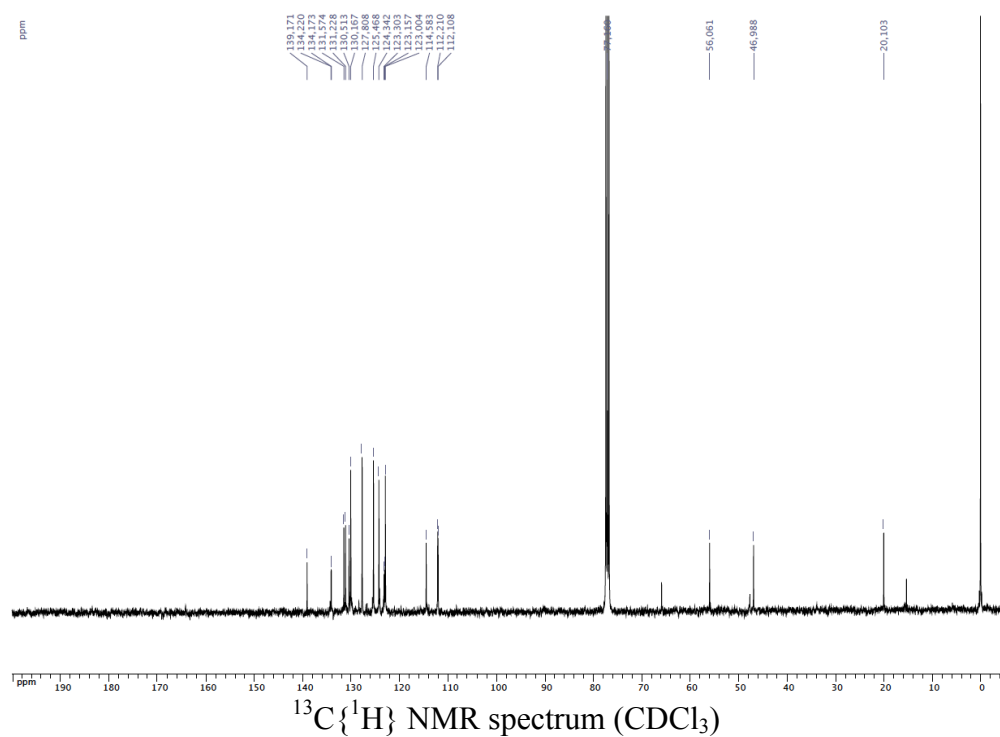



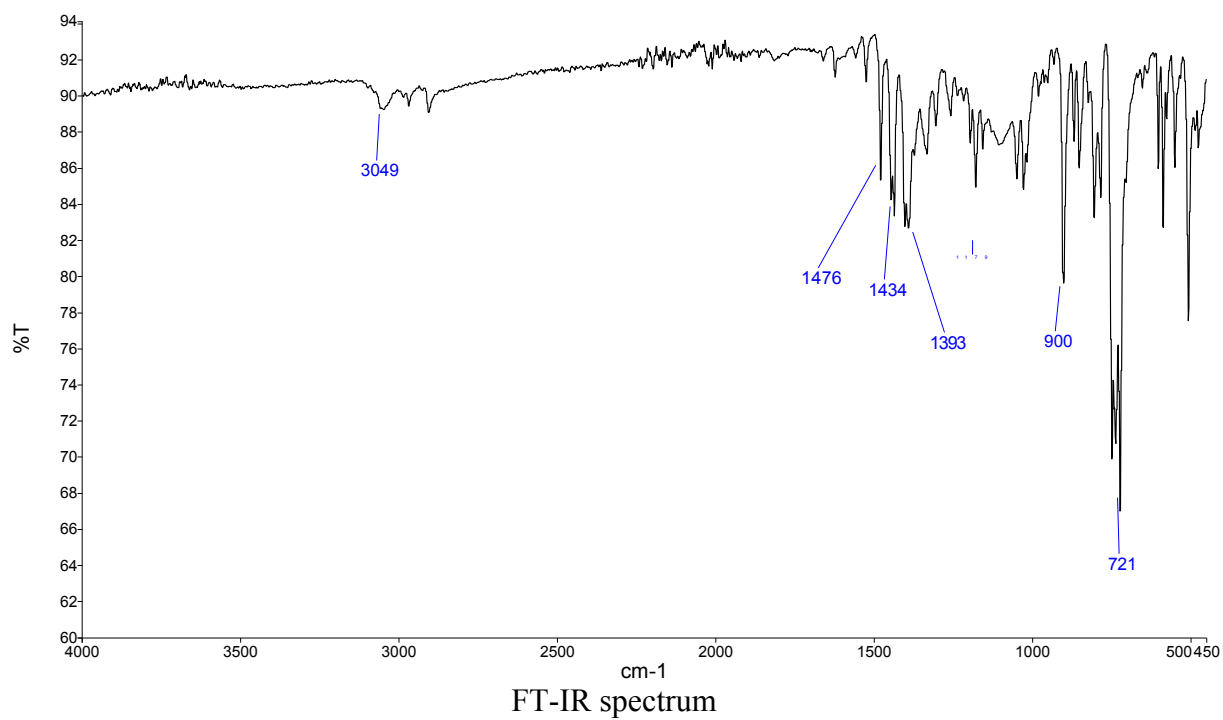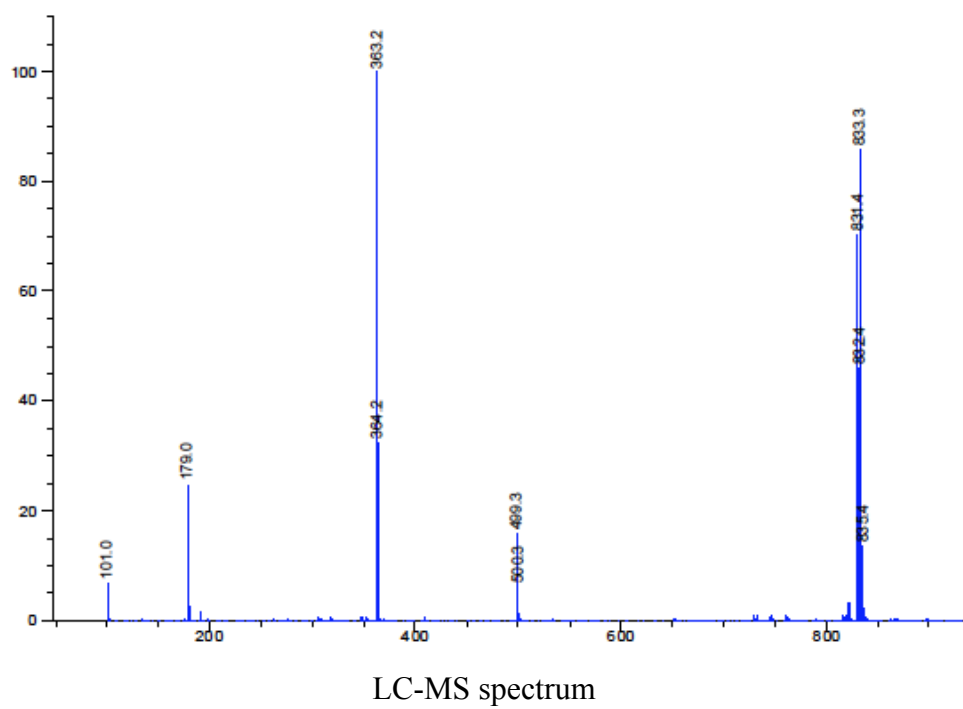

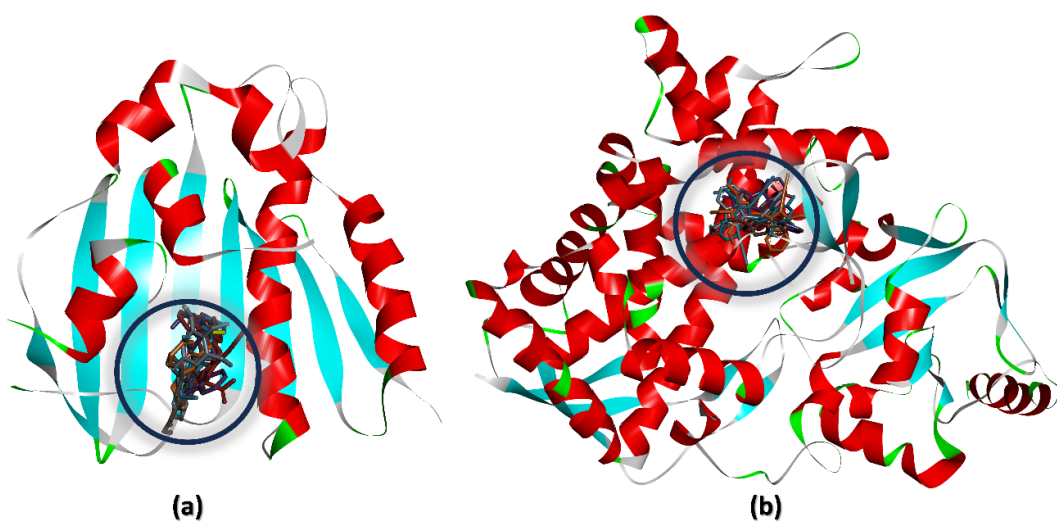

Interaction details of Ciprofloxacin and Fluconazole with (a) DNA gyrase of *Escherichia Coli* and (b) CYP51 from *Candida albicans*.

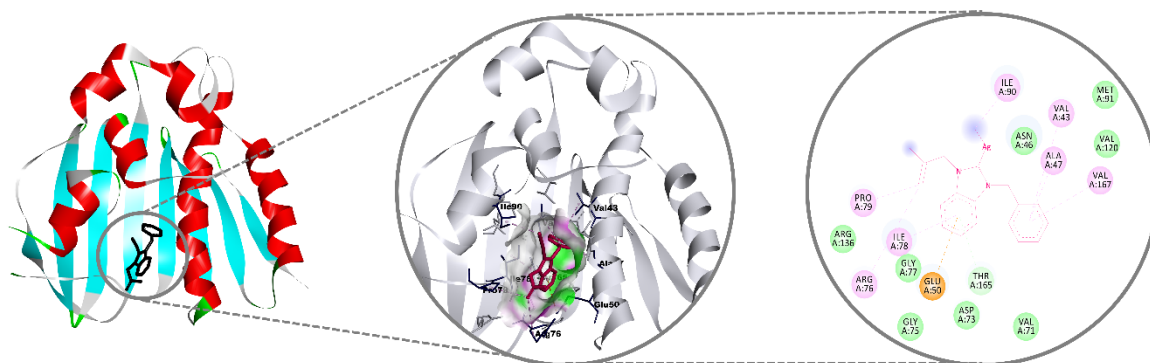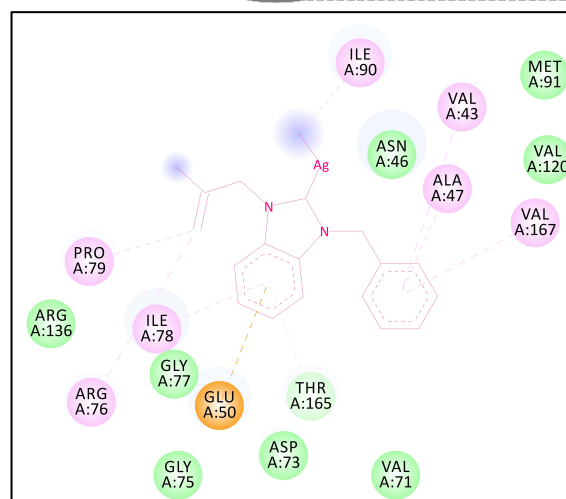

Interaction details of complex 6 with DNA gyrase of *Escherichia Coli*.

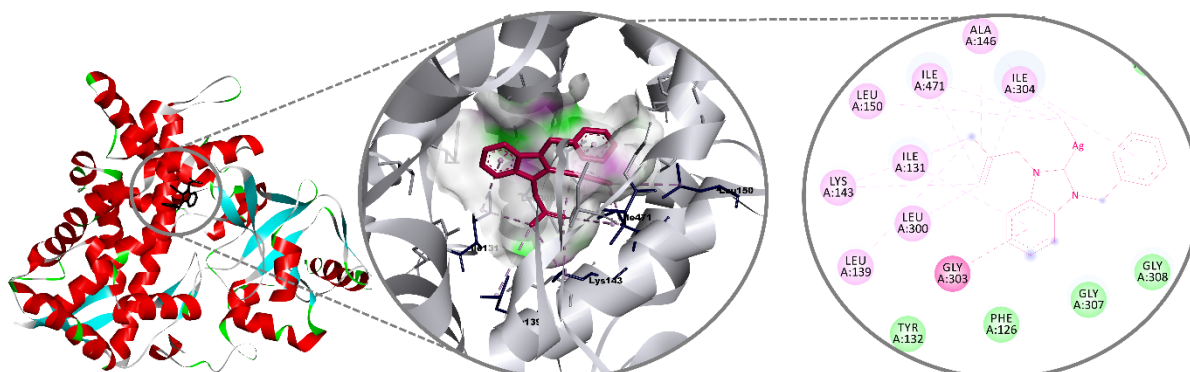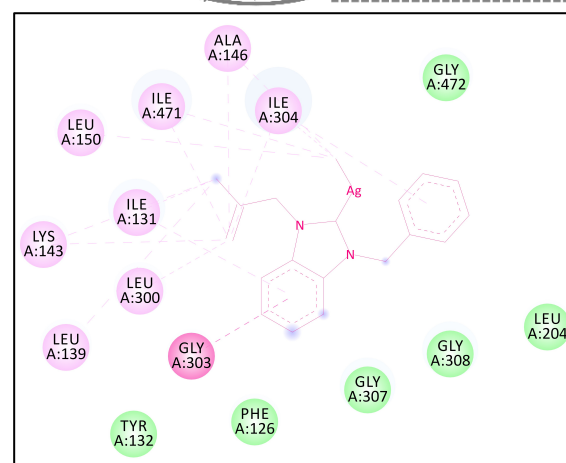

Interaction details of complex 6 with CYP51 of *Candida albicans*.

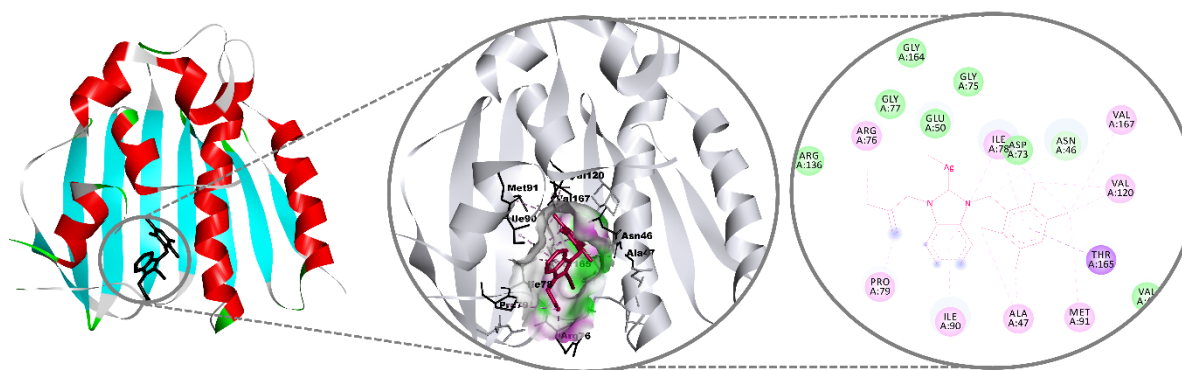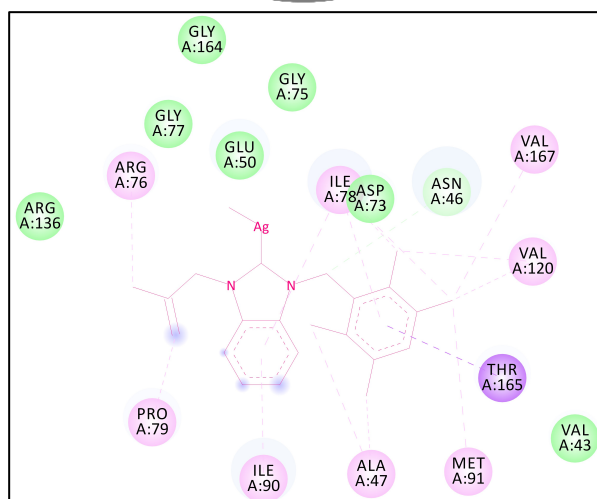

Interaction details of complex 7 with DNA gyrase of *Escherichia Coli*.

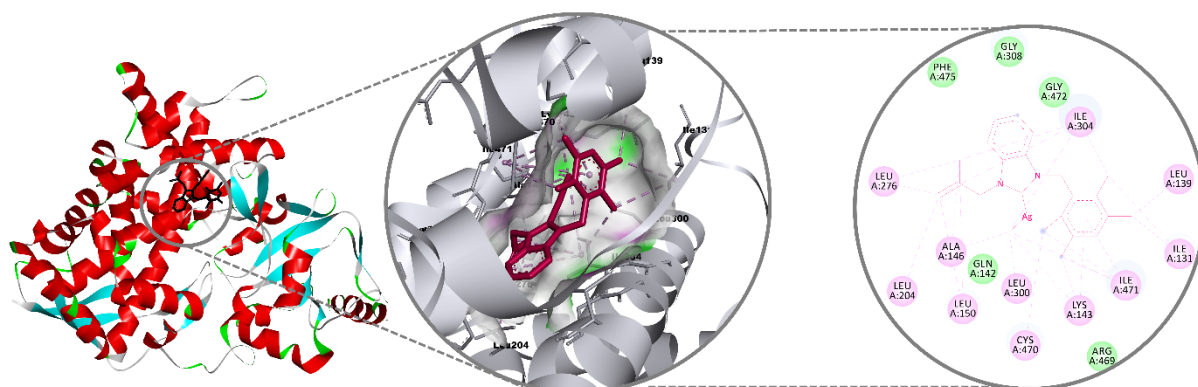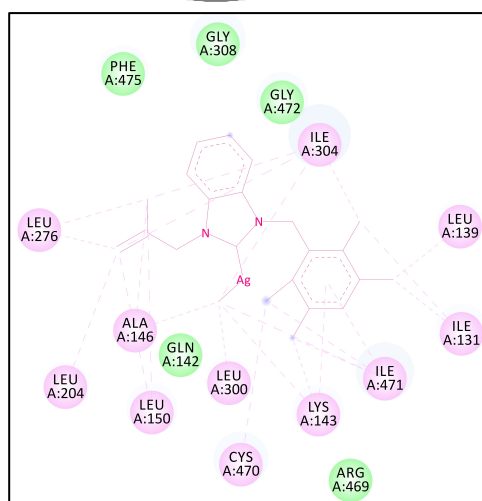

Interaction details of complex 7 with CYP51 of *Candida albicans*.

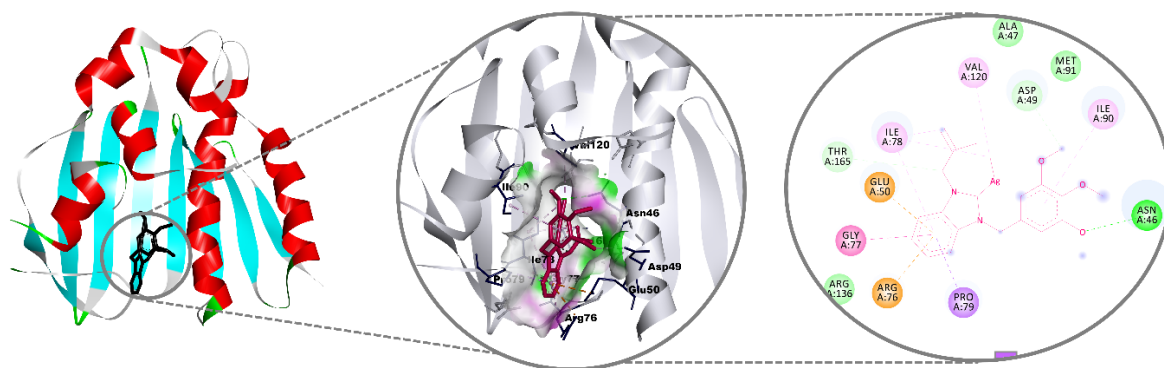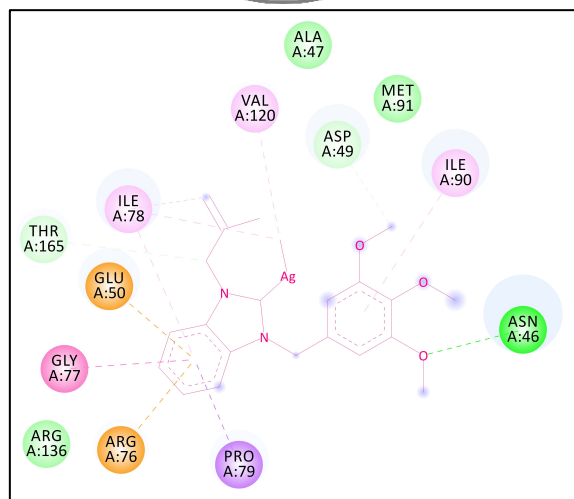

Interaction details of complex **8** with DNA gyrase of *Escherichia coli*.

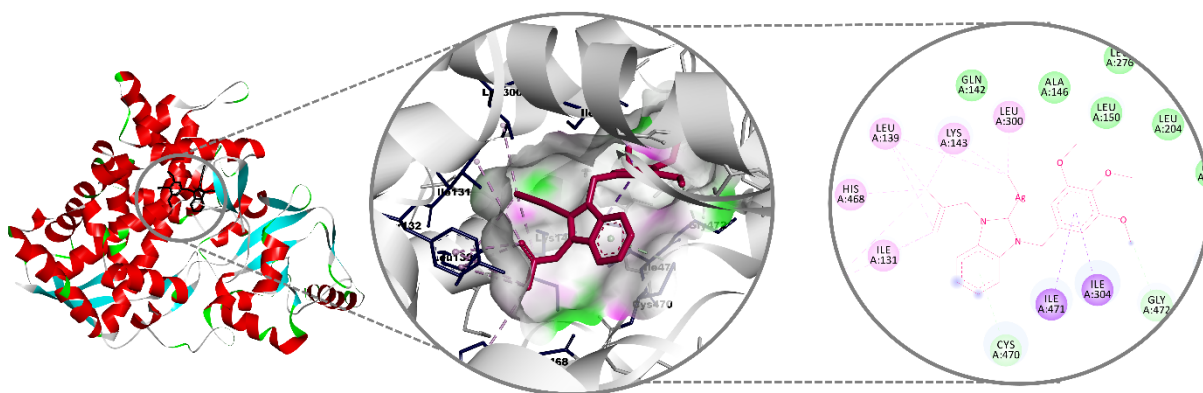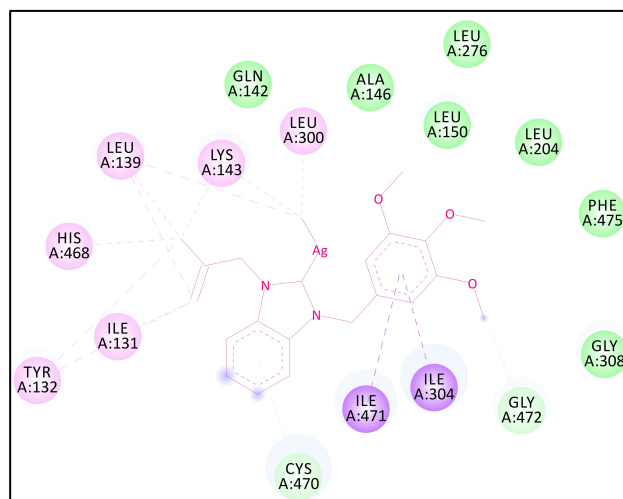

Interaction details of complex **8** with CYP51 of *Candida albicans*.

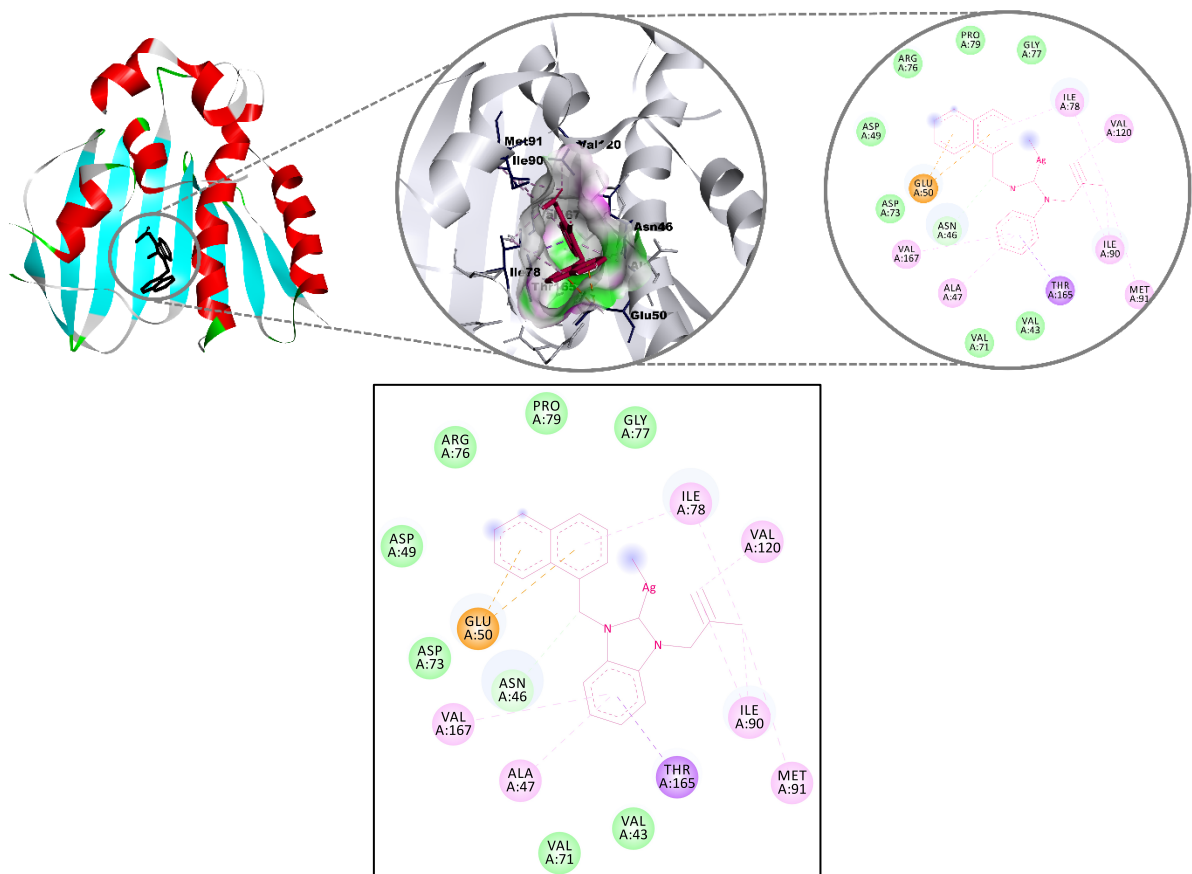

Interaction details of complex 9 with DNA gyrase of *Escherichia Coli*.

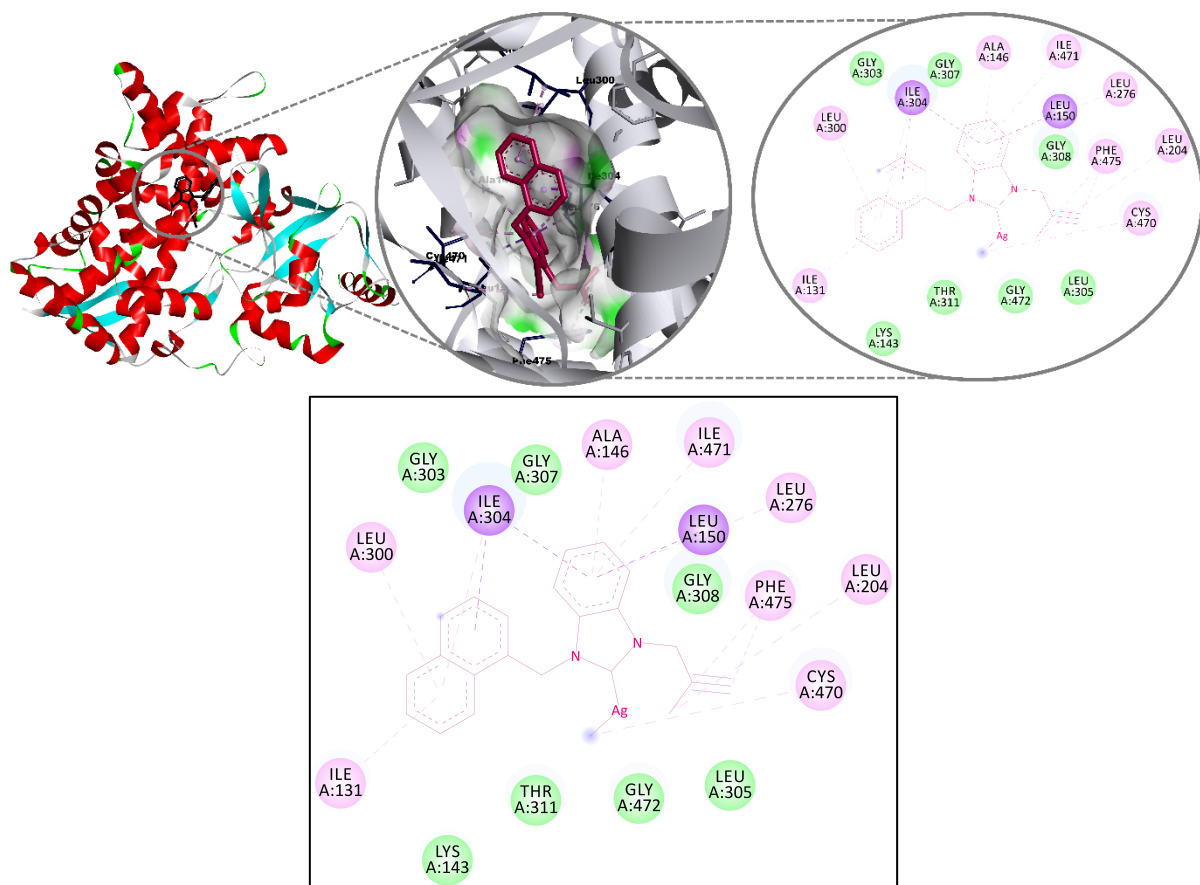

Interaction details of complex 9 with CYP51 of *Candida albicans*.



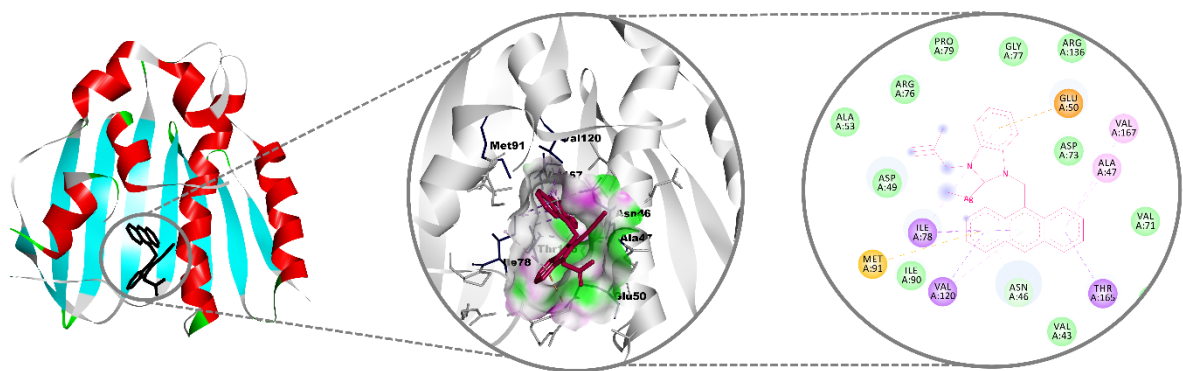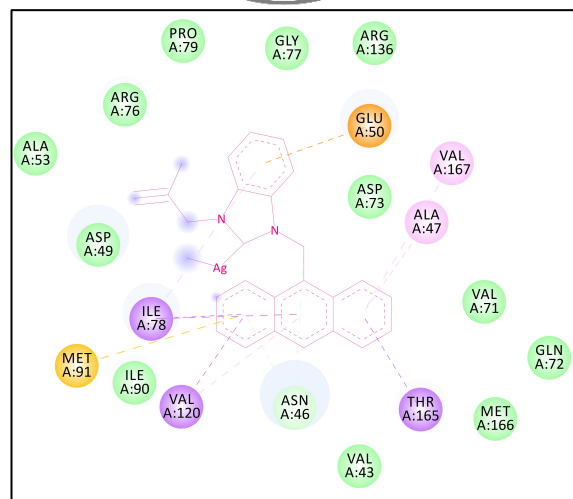

Interaction details of complex **10** with DNA gyrase of *Escherichia Coli*.

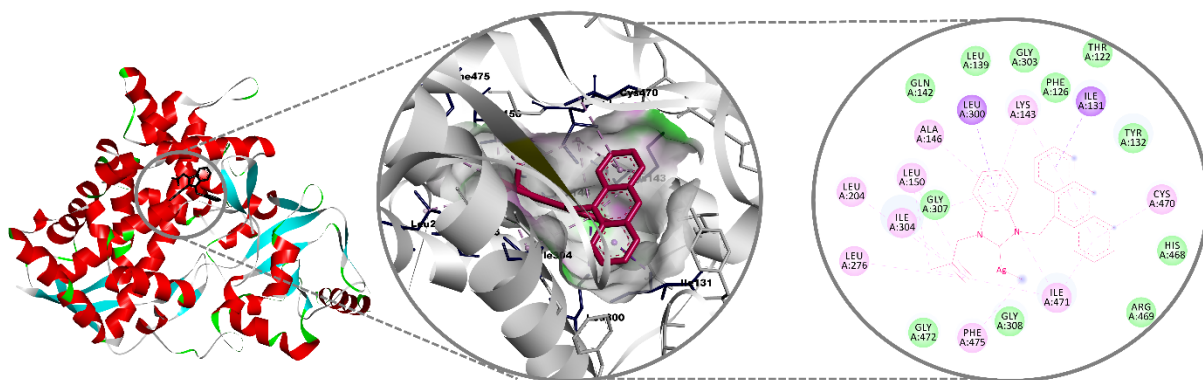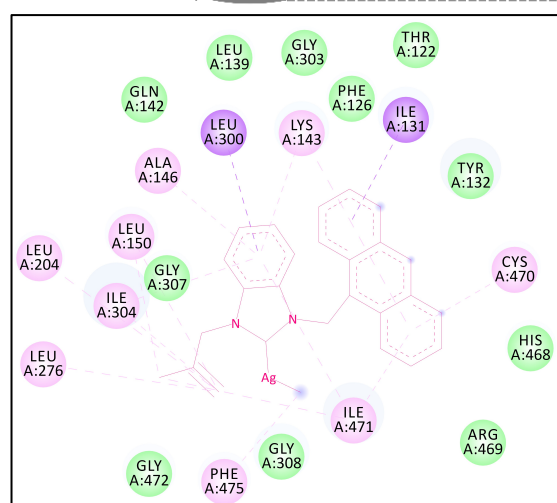

Interaction details of complex **10** with CYP51 of *Candida albicans*.
